# Supplementary material for: Common Genetic Variants in miR-1206 (8q24.2) and miR-612 (11q13.3) Affect Biogenesis of Mature miRNA Forms
Source: PubMed Central journal article supplement (PMC3471815; doi:10.1371/journal.pone.0047454), 2012-10-15
Supplement: pone.0047454.s001.pdf [file pone.0047454.s001.pdf]

# Supplementary Figure 1

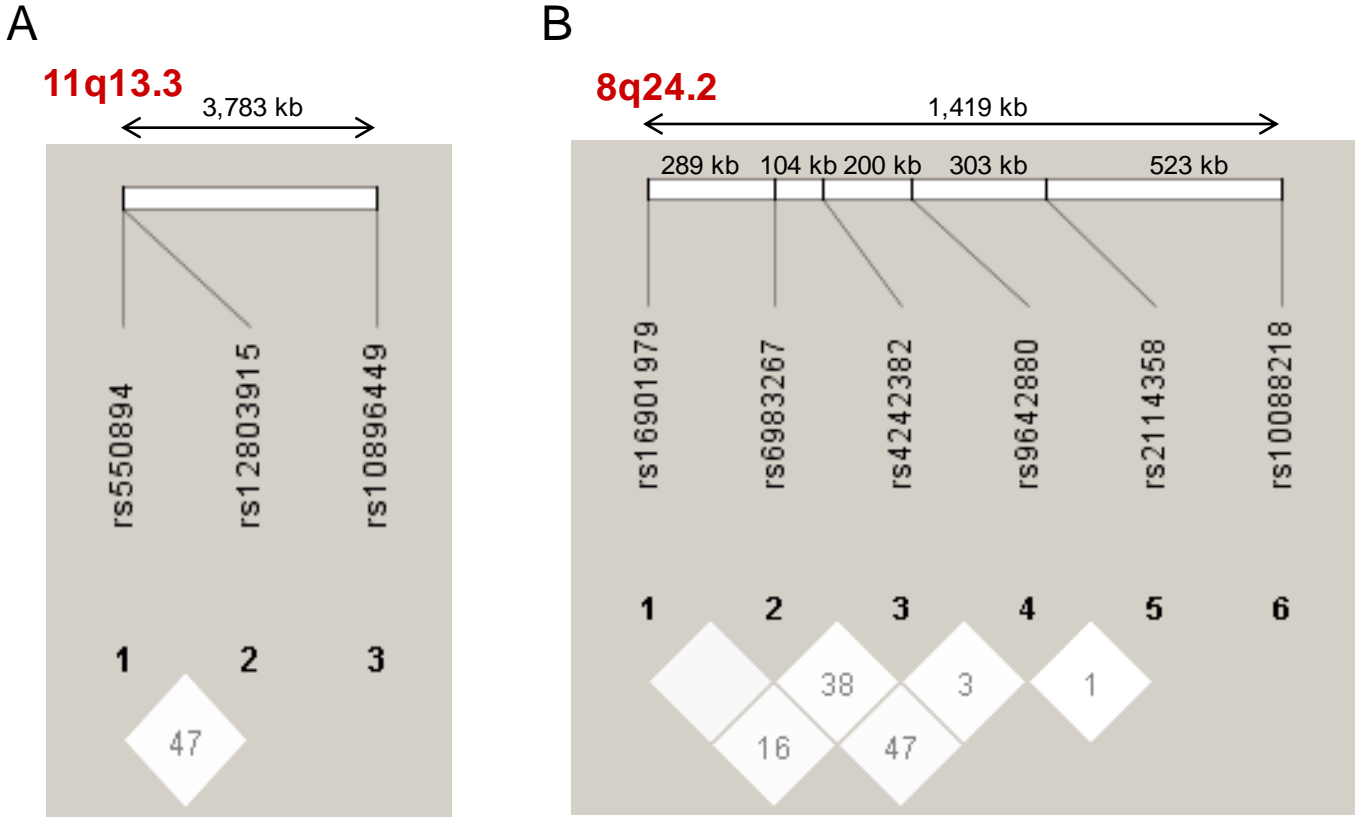

**Supplementary Figure 1. Linkage Disequilibrium (LD) plots of 8q24.2 and 11q13.2 regions.**

The plots are based on in HapMap (CEU) samples and include genetic variants within miR-1206 and miR-612 genes and GWAS signals. Numbers in blocks indicate  $r^2$  values.

**A.** LD plot of two miR-612 SNPs, rs550894 and rs12803915, and the 11q13 GWAS signal rs10896449.

**B.** LD plot of miR-1206 SNP rs2114358 and the 8q24.2 GWAS signals rs16901979, rs6983267, rs4242382, rs9642880, and rs10088218.
